# Supplementary material
Source: publisher figshare collection journal article supplement (https://acs.figshare.com/ndownloader/files/8174972)
Supplement: Supplementary file 1 [file 8174972]

## Supporting Information

1,3-Butadiene-induced adenine DNA adducts  
are genotoxic but only weakly mutagenic when  
replicated in *Escherichia coli* of various repair  
and replication backgrounds

Shiou-chi Chang<sup>†‡</sup>, Uthpala I. Seneviratne<sup>§</sup>, Jie Wu<sup>||</sup>,

Natalia Tretyakova<sup>§\*</sup>, and John M. Essigmann<sup>†‡<sup>⊥</sup>\*</sup>

<sup>†</sup>Department of Biological Engineering, <sup>‡</sup>Center for Environmental Health Sciences,

<sup>||</sup>BioMicro Center and <sup>⊥</sup>Department of Chemistry, Massachusetts Institute of Technology,

Cambridge, MA 02139, USA

<sup>§</sup>Department of Medicinal Chemistry, and the Masonic Cancer Center, University of

Minnesota, Minneapolis, MN 55455, USA

## Table of contents

**Table S1.** Error rate of the conserved sequence surrounding the site of interest in the control genome in wild-type cells (HK81) of the AlkB/DinB experiment.

**Table S2.** Error rate of the conserved sequence surrounding the site of interest in the control genome in wild-type cells (AB1157) of the MutM/MutY experiment.

**Figure S1.** Lesion bypass efficiency of  $\epsilon$ A in the five conditions with various AlkB, DinB and SOS-induction statuses.

**Figure S2.** Lesion bypass efficiency of  $\epsilon$ A and 8-oxoG in the four cell strains with various MutM and MutY statuses.

**Figure S3.** Mutation frequency and specificity of  $\epsilon$ A in the five conditions with various AlkB, DinB and SOS-induction statuses.

**Figure S4.** Mutation frequency and specificity of the negative control (A) in the five conditions with various AlkB, DinB and SOS-induction statuses.

**Figure S5.** Mutation frequency and specificity of the negative control (A) in the four cell strains with various MutM and MutY statuses.

**Figure S6.** Mutation frequency and specificity of 8-oxoG in the four cell strains with various MutM and MutY statuses.

**Table S1.** Error rate of the conserved sequence surrounding the site of interest (site N in Figure 2 and this table) in the control genome in wild-type cells (HK81) of the AlkB/DinB experiment. The expected sequence of the 21 bases encompassing the site of interest is 5'-ACGAAGACCTNGGCGTCCAAT-3' where N is the site of interest at position 6260. The average error rate from the three biological replicates at each of the 21 sites is presented along with the standard deviation.

| Position | Expected base | Average error rate | SD    |
|----------|---------------|--------------------|-------|
| 6250     | A             | 0.19%              | 0.04% |
| 6251     | C             | 0.17%              | 0.04% |
| 6252     | G             | 0.19%              | 0.06% |
| 6253     | A             | 0.20%              | 0.08% |
| 6254     | A             | 0.57%              | 0.19% |
| 6255     | G             | 0.31%              | 0.10% |
| 6256     | A             | 0.28%              | 0.17% |
| 6257     | C             | 0.14%              | 0.03% |
| 6258     | C             | 0.20%              | 0.02% |
| 6259     | T             | 0.26%              | 0.08% |
| 6260     | N             | 0.71%              | 0.18% |
| 6261     | G             | 0.36%              | 0.09% |
| 6262     | G             | 0.35%              | 0.10% |
| 6263     | C             | 0.33%              | 0.10% |
| 6264     | G             | 0.42%              | 0.05% |
| 6265     | T             | 0.20%              | 0.07% |
| 6266     | C             | 0.52%              | 0.15% |
| 6267     | C             | 0.58%              | 0.08% |
| 6268     | A             | 0.13%              | 0.05% |
| 6269     | A             | 0.10%              | 0.03% |
| 6270     | T             | 0.10%              | 0.03% |

**Table S2.** Error rate of the conserved sequence surrounding the site of interest (site N in Figure 2 and this table) in the control genome in wild-type cells (AB1157) of the MutM/MutY experiment. The expected sequence of the 21 bases encompassing the site of interest is 5'-ACGAAGACCTNGGCGTCCAAT-3' where N is the site of interest at position 6260. The average error rate from the three biological replicates at each of the 21 sites is presented along with the standard deviation.

| Position | Expected base | Average error rate | SD    |
|----------|---------------|--------------------|-------|
| 6250     | A             | 0.11%              | 0.02% |
| 6251     | C             | 0.15%              | 0.01% |
| 6252     | G             | 0.12%              | 0.02% |
| 6253     | A             | 0.07%              | 0.04% |
| 6254     | A             | 0.10%              | 0.01% |
| 6255     | G             | 0.16%              | 0.02% |
| 6256     | A             | 0.30%              | 0.09% |
| 6257     | C             | 0.15%              | 0.06% |
| 6258     | C             | 0.20%              | 0.07% |
| 6259     | T             | 0.34%              | 0.03% |
| 6260     | N             | 1.31%              | 0.08% |
| 6261     | G             | 0.15%              | 0.04% |
| 6262     | G             | 0.15%              | 0.02% |
| 6263     | C             | 0.14%              | 0.06% |
| 6264     | G             | 0.17%              | 0.01% |
| 6265     | T             | 0.19%              | 0.02% |
| 6266     | C             | 0.11%              | 0.03% |
| 6267     | C             | 0.09%              | 0.02% |
| 6268     | A             | 0.08%              | 0.01% |
| 6269     | A             | 0.08%              | 0.05% |
| 6270     | T             | 0.06%              | 0.01% |

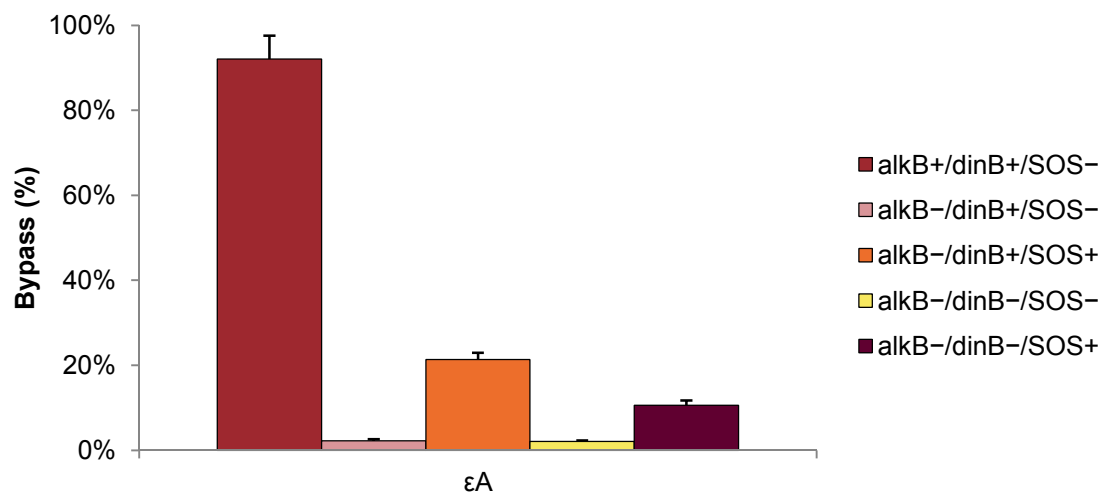

**Figure S1.** Lesion bypass efficiency of  $\epsilon$ A in the five conditions with various AlkB, DinB and SOS-induction statuses. Error bars represent one SD (N = 3).

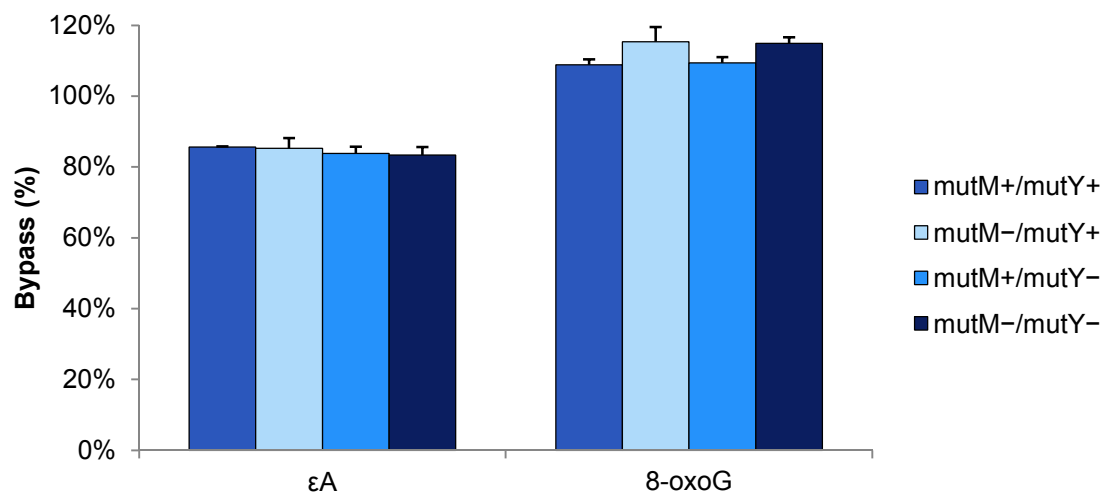

**Figure S2.** Lesion bypass efficiency of  $\epsilon$ A and 8-oxoG in the four cell strains with various MutM and MutY statuses. Error bars represent one SD (N = 3).

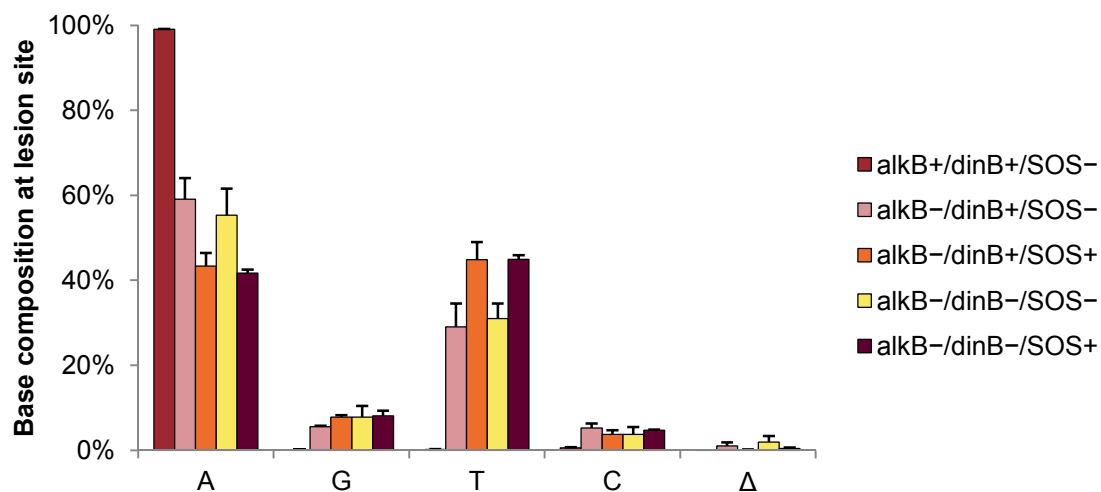

**Figure S3.** Mutation frequency and specificity of  $\epsilon$ A in the five conditions with various AlkB, DinB and SOS-induction statuses. A, G, T and C indicate the possible bases present at the lesion site (site N of Figure 2) after *in vivo* replication, and  $\Delta$  denotes the occurrence of deletions at the lesion site. Error bars represent one SD (N = 3).

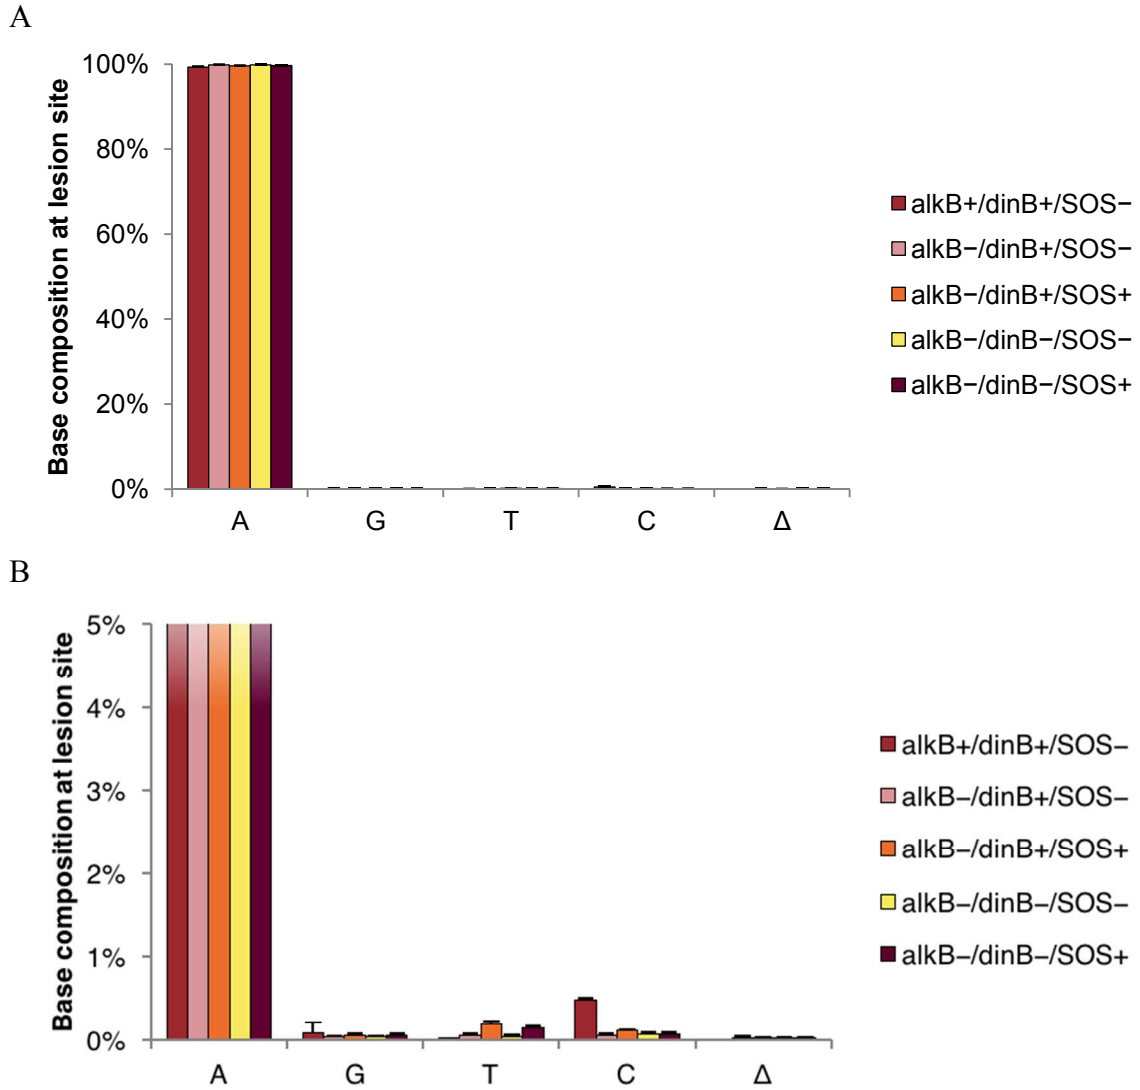

**Figure S4.** Mutation frequency and specificity of the negative control (A) in the five conditions with various AlkB, DinB and SOS-induction statuses. *A*, the complete chart with the y-axis ranging from 0 to 100%. *B*, the y-axis is enlarged to show low frequency events. A, G, T and C indicate the possible bases present at the lesion site (site N of Figure 2) after *in vivo* replication, and Δ denotes the occurrence of deletions at the lesion site. Error bars represent one SD (N = 3).



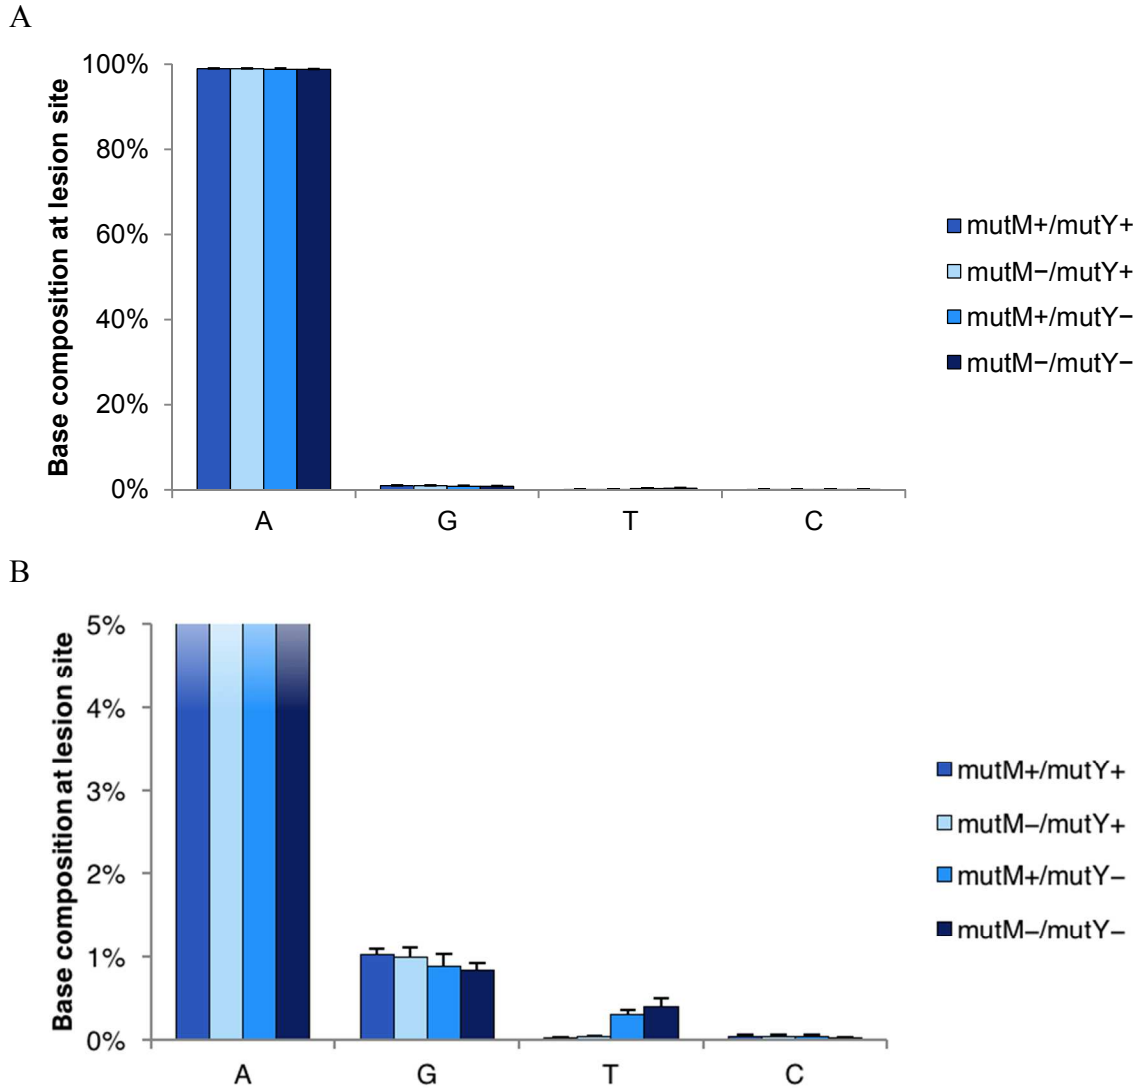

**Figure S5.** Mutation frequency and specificity of the negative control (A) in the four cell strains with various MutM and MutY statuses. *A*, the complete chart with the y-axis ranging from 0 to 100%. *B*, the y-axis is enlarged to show low frequency events. A, G, T and C indicate the possible bases present at the lesion site (site N of Figure 2) after *in vivo* replication. Error bars represent one SD (N = 3).

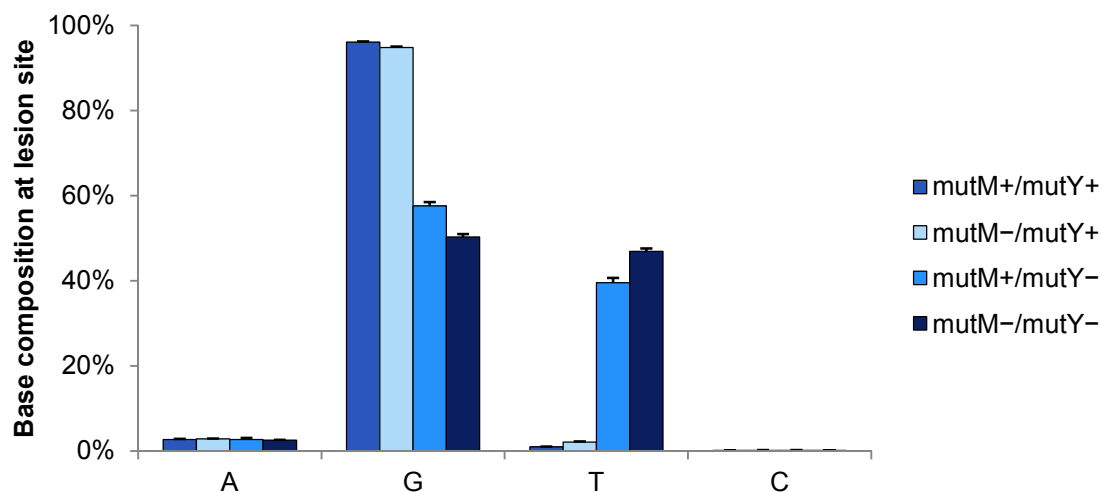

**Figure S6.** Mutation frequency and specificity of 8-oxoG in the four cell strains with various MutM and MutY statuses. A, G, T and C indicate the possible bases present at the lesion site (site N of Figure 2) after *in vivo* replication. Error bars represent one SD (N = 3). Deletion mutation was not included here because this lesion is not known to cause deletions.
